# Supplementary material for: A flexible, multifunctional, active terahertz modulator with an ultra-low triggering threshold
Source: Royal Society of Chemistry journal article supplement (doi:10.1039/d0tc02446e), 2020-01-01
Supplement: d0tc02446e1.pdf [file d0tc02446e1.pdf]

## Supplementary Information for

### A flexible, multifunctional, active terahertz modulator with an ultra-low triggering threshold

He Ma,<sup>a</sup> Yu Wang,<sup>a</sup> Lu Rong,<sup>a</sup> Fangrui Tan,<sup>a</sup> Yulan Fu,<sup>a</sup> Guang Wang,<sup>b</sup> Dayong Wang,<sup>a</sup> Kai Liu,<sup>c</sup> Shoushan Fan,<sup>b</sup> Kaili Jiang,<sup>b</sup> and Xiping Zhang,<sup>a,\*</sup>

a. College of Applied Sciences, Beijing University of Technology, Beijing 100124, P. R. China

b. State Key Laboratory of Low-Dimensional Quantum Physics, Tsinghua-Foxconn Nanotechnology Research Center, Department of Physics, Tsinghua University, Beijing 100084, P. R. China

c. State Key Laboratory of New Ceramics and Fine Processing, School of Material Science and Engineering, Tsinghua University, Beijing 100084, P. R. China

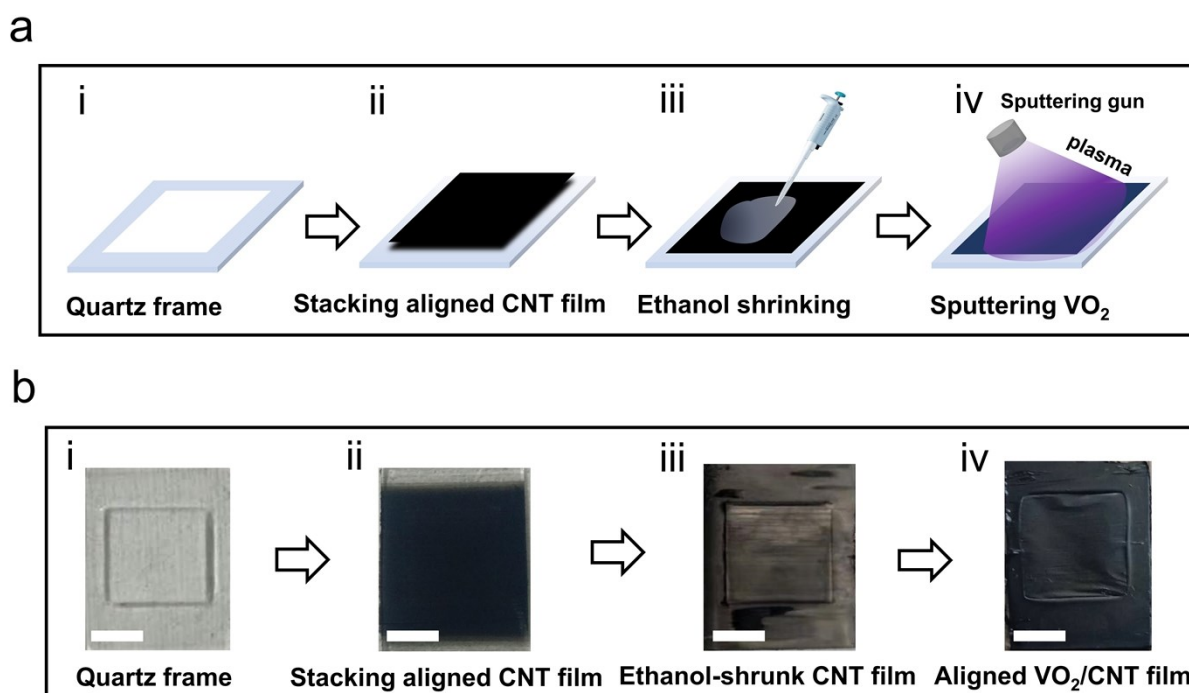

**Figure S1.** Preparation of VO<sub>2</sub>/CNT THz AMs. (a) Schematic of THz AM fabrication using a VO<sub>2</sub>/CNT film. (b) Corresponding optical images for process steps i through iv. The scale bar is 5 mm.

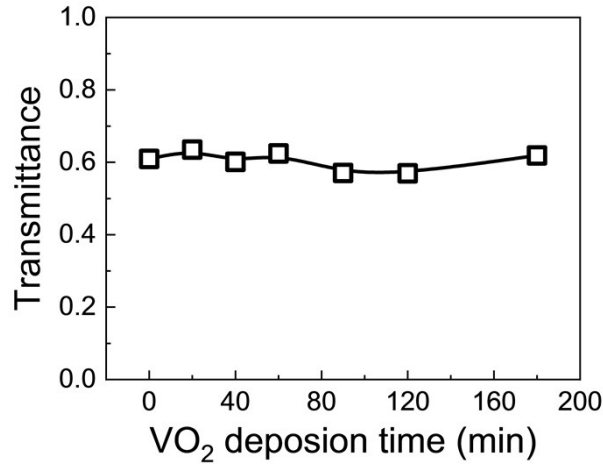

**Figure S2.** Dependence of the VO<sub>2</sub>/CNT THz AM average transmittance on the VO<sub>2</sub> deposition time.

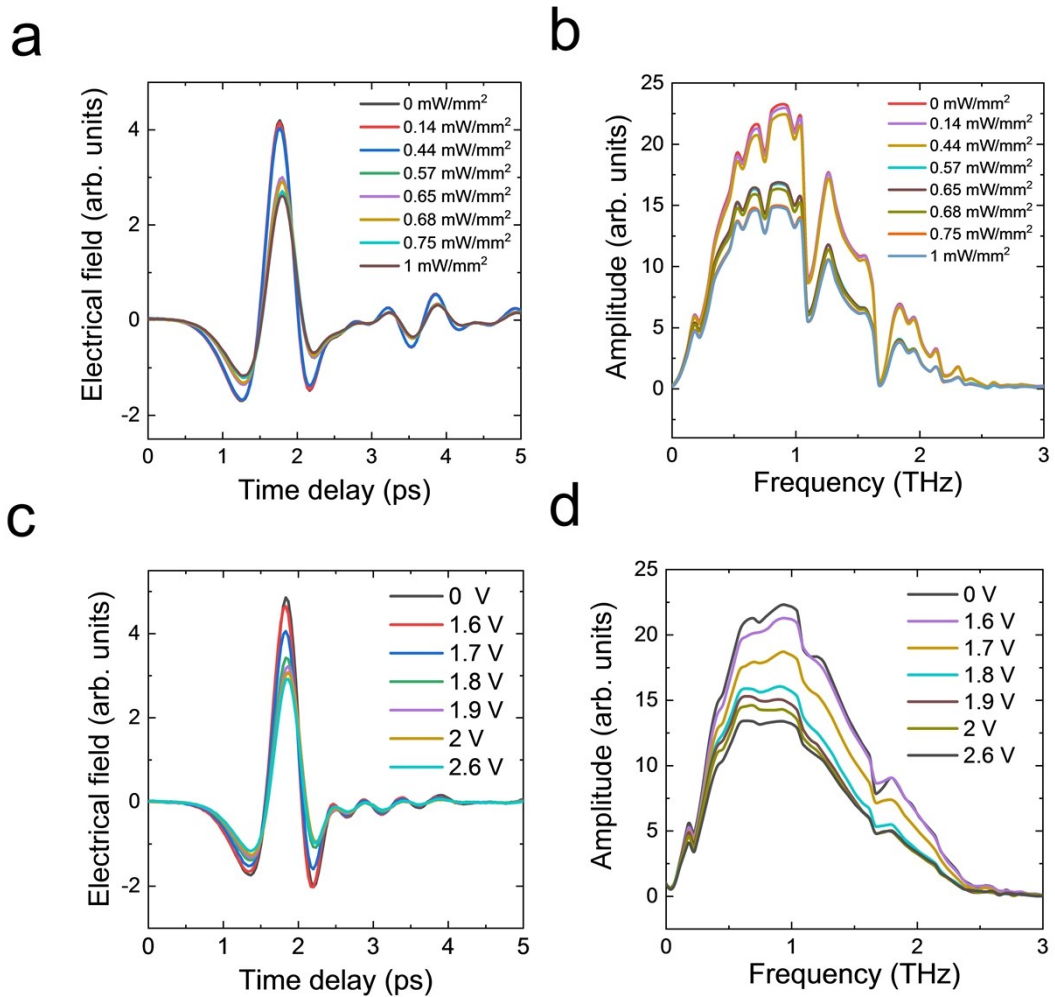

**Figure S3.** (a) Transmission spectra of VO<sub>2</sub>/CNT THz AM in time domain under the light stimulation. (b) Fourier transforms of the time-domain transmission spectra under the light stimulation. (c) Transmission spectra of VO<sub>2</sub>/CNT THz AM in time domain under the electrical stimulation. (d) Fourier transform of the time-domain transmission spectra under the laser

stimulation. The measurements of photo and electrical stimulations were performed in air and in a nitrogen atmosphere, respectively.

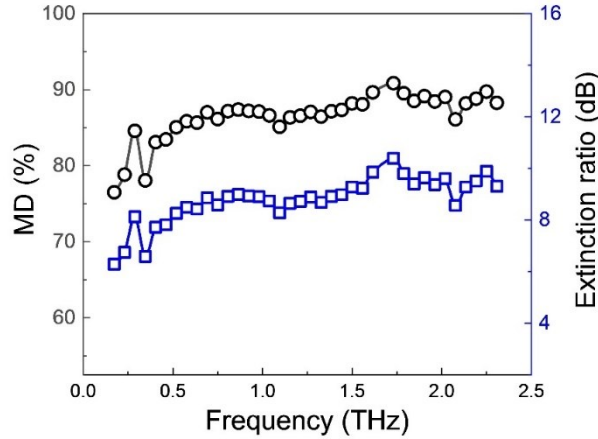

**Figure S4.** MD and extinction ratio of the VO<sub>2</sub>/CNT THz AM (180 min VO<sub>2</sub>) in the frequency from 0.2 THz to 2.5 THz.

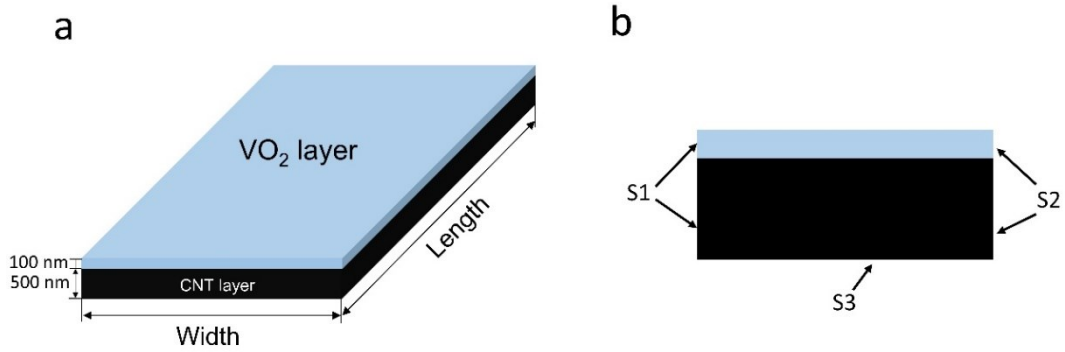

**Figure S5.** (a) Geometrical model of the VO<sub>2</sub>/CNT film in the transient thermal transfer model. (b) Front view of the geometrical model.

The geometrical model of VO<sub>2</sub>/CNT film in the transient thermal transfer model is shown in Figure S5a. The 3D transient thermal transfer equation  $\rho C_p \frac{\partial T}{\partial t} + \nabla \cdot (-k \nabla T) = Q$  is solved by the COMSOL Multiphysics software, where  $\rho$  is the density,  $C_p$  is the specific heat capacity at constant stress,  $k$  is the thermal conductivity, and  $Q$  is the heat source. In our model, the density of the CNT film<sup>1</sup> is 300 kg/m<sup>3</sup>, the  $C_p$  of the CNT film<sup>2</sup> is 710 J/(kg·K), the thermal conductivity of the CNT film<sup>3</sup> is 136 W/(m·K), the density of VO<sub>2</sub> is 4600 kg/m<sup>3</sup>, the  $C_p$  of the VO<sub>2</sub><sup>4</sup> is 690 J/(kg·K), and the thermal conductivity of the VO<sub>2</sub><sup>[4]</sup> is 5 W/(m·K). Thicknesses of the VO<sub>2</sub> layer and the CNT layer are fixed at 100 nm and 500 nm, respectively. The width and the length of the VO<sub>2</sub>/CNT film are equal and are varied together. The boundary conditions are as follows. As shown in Figure S5b, the temperature of two side surfaces (S1 and S2) is set to 298 K. The underside surface (S3) is irradiated by laser and thus an inward heat, which energy (W/m<sup>2</sup>) is equal to the laser power, is set on this surface. For other surfaces, the boundary conditions are  $-n \cdot \nabla(-k \cdot \nabla T) = h(T - T_0)$ , where  $h$  is the heat transfer coefficient of air (20 W/m<sup>2</sup>/K),  $T_0$  is the environmental temperature (298K).

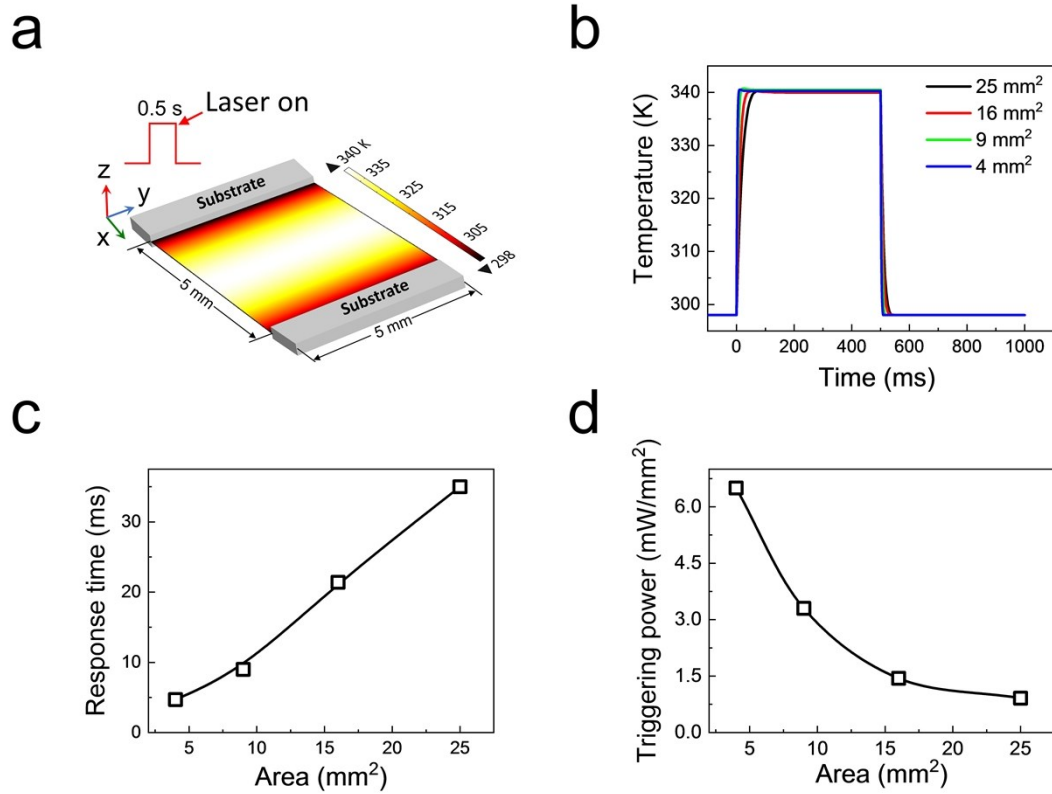

**Figure S6.** Simulated dynamic response of a VO<sub>2</sub>/CNT THz AM to a laser pulse. (a) Temperature distribution on a VO<sub>2</sub>/CNT THz AM with an area of 25 mm<sup>2</sup> at 300 ms. (b) Dynamic responses of VO<sub>2</sub>/CNT THz AMs of various sizes. Dependences of (c) the response time and (d) the triggering power on the device area.

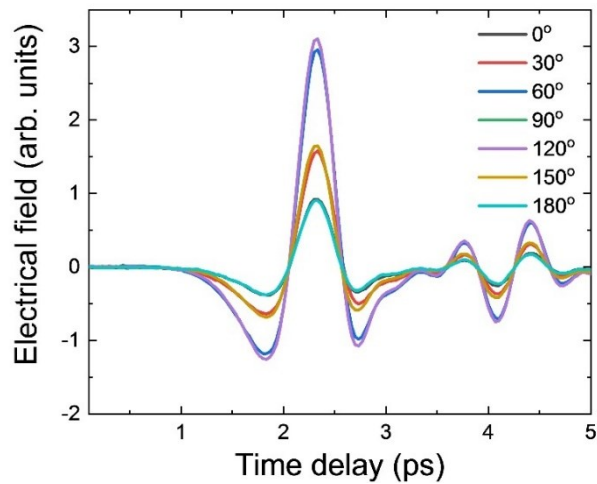

**Figure S7.** Transmission spectra of VO<sub>2</sub>/CNT THz AM in the time domain at different polarizing degrees. The measurement was performed in air.

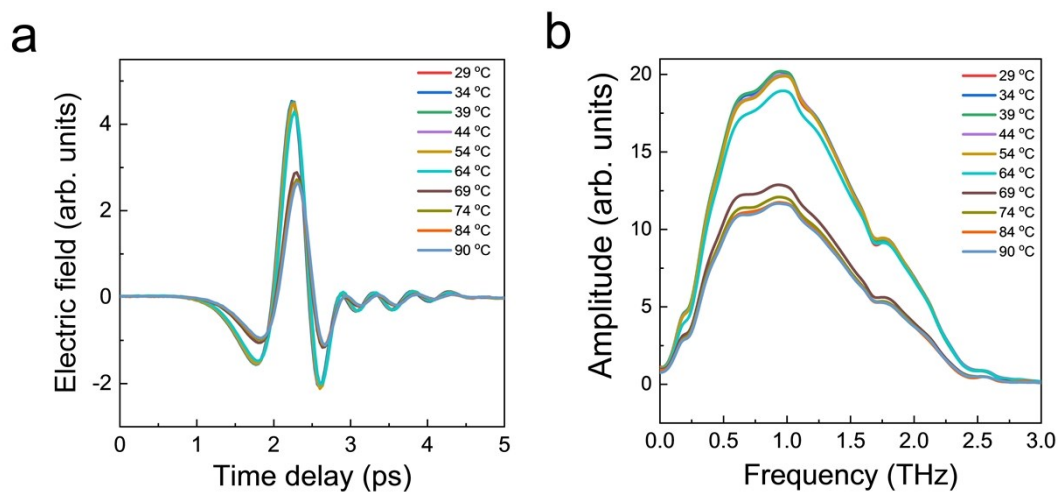

**Figure S8.** (a) Transmission spectra of VO<sub>2</sub>/CNT THz AM in time domain under different temperatures. (b) Fourier transforms of the time-domain transmission spectra. The measurement was performed in a nitrogen atmosphere.

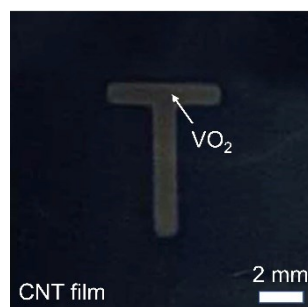

**Figure S9.** Optical image of the pattern VO<sub>2</sub>/CNT AM.

#### References

1. G. Zhang, C. Liu, S. Fan, *Sci. Rep.*, 2013, **3**, 2549.
2. P. Liu, L. Liu, Y. Wei, K. Liu, Z. Chen, K. Jiang, Q. Li, S. Fan, *Adv. Mater.*, 2009, **21**, 3563-3566.
3. K. Wang, C. Cheng, E. Cardona, J. Guan, K. Liu, J. Wu, *ACS Nano*, 2013, **7**, 2266-2272.
3. H. Ma, J. Hou, X. Wang, J. Zhang, Z. Yuan; L. Xiao, Y. Wei, S. Fan, K. Jiang, K. Liu, *Nano Lett.*, 2017, **17**, 421-428.
